# Supplementary material for: Upgrading a microplate reader for photobiology and all-optical experiments
Source: Royal Society of Chemistry journal article supplement (doi:10.1039/c4pp00361f), 2014-10-24
Supplement: c4pp00361f2.pdf [file c4pp00361f2.pdf]

## 1 Supplementary Information

### 2 Supplementary Table 1 - List of parts for plate reader illumination upgrade

| Item                                        | Supplier                           | Part no.                                               |
|---------------------------------------------|------------------------------------|--------------------------------------------------------|
| fiber-optics waveguide $\varnothing$ 1.5 mm | Thorlabs, Dachau                   | FT1500UMT                                              |
| multi-LED light source                      | Mightex Systems, Toronto           | WFC-H8-0385-0420-0470-0530-<br>0590-0617-0680-0850-000 |
| control unit multi-LED light source         | Mightex Systems, Toronto           | BLS-SA04-US                                            |
| Arduino-Mega microcontroller                | EXP GmbH, Saarbrücken              | EXP-R08-009                                            |
| Seedstudio CAN-BUS Shield                   | EXP GmbH, Saarbrücken              | EXP-R02-200                                            |
| serial port Y-cable                         | Reichelt Elektronik GmbH,<br>Sande | DELOCK 65403                                           |
| serial port gender changer                  | Reichelt Elektronik GmbH,<br>Sande | COM 990                                                |

3

4

### 5 Supplementary Figure 1 - Intercepting CAN-bus communication

6 (A) The serial cable that connects the plate reader to its injector module has 9 pins; the CAN-  
7 bus communication occurs via pins 3 (CAN-Low) and 4 (CAN-High).

8 (B) An RS232 Y-cable is spliced into the serial connection between plate reader and injector  
9 module such that the CAN-bus communication can be intercepted and processed by an Arduino  
10 microcontroller. To this end, two jumper wires were soldered to pins 3 and 4 of the free RS232  
11 port of the Y-cable and then connected to the respective ports on the Seedstudio CAN-Bus  
12 Shield.

13
