# Supplementary figures and images for: Upgrading a microplate reader for photobiology and all-optical experiments
Source: Royal Society of Chemistry journal article supplement (doi:10.1039/c4pp00361f), 2014-10-24

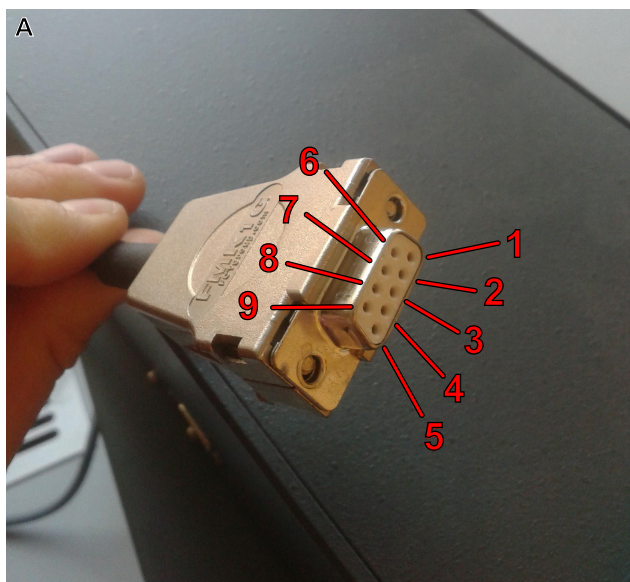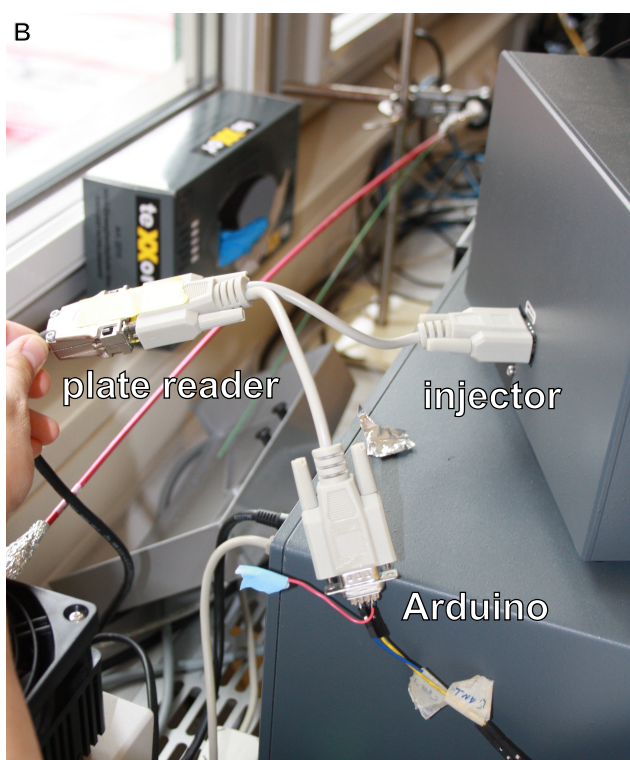

Supplement: c4pp00361f1.pdf [file c4pp00361f1.pdf]
